# Supplementary material for: The Acute Effect of Two Physical Exercise Programs on Cognitive Performance in Schoolchildren
Source: Research Square preprint supplement (doi:10.21203/rs.3.rs-4024532/v1), 2024-03-13
Supplement: Supplementary file 1 [file a124068a61b9ae72001181ec.docx]

**Additional file 1.** Parameter estimates generated by GEE for intercepts and covariates.

|  | ***B*** | **SE** | **Wald 95% CI** | **Wald χ2** | ***df*** | ***p*** |
| --- | --- | --- | --- | --- | --- | --- |
| Model 1 – Dependent Variable: Trail – Letters and numbers – Time | | | | | | |
| Intercept | 117.790 | 146.027 | -168.418; 403.998 | 0.651 | 1 | 0.42 |
| Sex | 18.355 | 21.3837 | -23.556; 60.266 | 0.737 | 1 | 0.39 |
| PHV | 4.490 | 11.138 | -17.340; 26.320 | 0.163 | 1 | 0.66 |
| Age | 3.717 | 11.823 | -19.455; 26.889 | 0.099 | 1 | 0.75 |
| BMI | -1.325 | 1.568 | -4.399; 1.749 | 0.714 | 1 | 0.40 |
| CRF | 0.011 | 0.040 | -0.067; 0.089 | 0.076 | 1 | 0.78 |
| Modelo 2 – Dependent Variable: Trail – Letters and numbers – Errors | | | | | | |
| Intercepto | 0.916 | 6.302 | -11.435; 13.267 | 0.021 | 1 | 0.88 |
| Sex | 0.305 | 0.778 | -1.219; 1.829 | 0.154 | 1 | 0.70 |
| PHV | -0.047 | 0.430 | -0.889; 0.795 | 0.012 | 1 | 0.91 |
| Age | -0.112 | 0.547 | -1.184; 0.961 | 0.042 | 1 | 0.84 |
| BMI | 0.044 | 0.048 | -0.050; 0.139 | 0.841 | 1 | 0.36 |
| CRF | 0.001 | 0.001 | -0.001; 0.003 | 0.430 | 1 | 0.51 |
| Model 3 – Dependent Variable: Stroop – Time | | | | | | |
| Intercept | -17999.934 | 54483.037 | -124784.724; 88784.857 | 0.109 | 1 | 0.74 |
| Sex | -9497.449 | 7325.888 | -23855.927; 4861.028 | 1.681 | 1 | 0.20 |
| PHV | -7293.261 | 4405.482 | -15927.846; 1341.325 | 2.741 | 1 | 0.10 |
| Age | 10885.540 | 4929.883 | 1223.148; 20547.932 | 4.876 | 1 | 0.03 |
| BMI | 716.684 | 592.923 | -445.424; 1878.791 | 1.461 | 1 | 0.23 |
| CRF | -26.026 | 13.435 | -52.359; 0.307 | 3.752 | 1 | 0.05 |
| Model 4 – Dependent Variable: Stroop – Errors | | | | | | |
| Intercept | -9.935 | 6.680 | -23.026; 3.157 | 2.212 | 1 | 0.14 |
| Sex | -0.217 | 1.080 | -2.333; 1.899 | 0.041 | 1 | 0.84 |
| PHV | -0.073 | 0.628 | -1.304; 1.159 | 0.013 | 1 | 0.91 |
| Age | 1.034 | 0.514 | 0.027; 2.041 | 4.048 | 1 | 0.04 |
| BMI | 0.004 | 0.0820 | -0.157; 0.164 | 0.002 | 1 | 0.96 |
| CRF | 0.001 | 0.003 | -0.004; 0.006 | 0.233 | 1 | 0.63 |

*Notes*: SE: Standard error; 95% CI: 95% Confidence interval; χ2: Chi-square; *df*: degrees of freedom; PHV: Peak height velocity; BMI: Body mass index; CRF: cardiorespiratory fitness
